# Supplementary material
Source: PubMed Central journal article supplement (PMC8086435)
Supplement: NIHMS1679849-supplement-Supplemental_figures.pdf [file NIHMS1679849-supplement-Supplemental_figures.pdf]

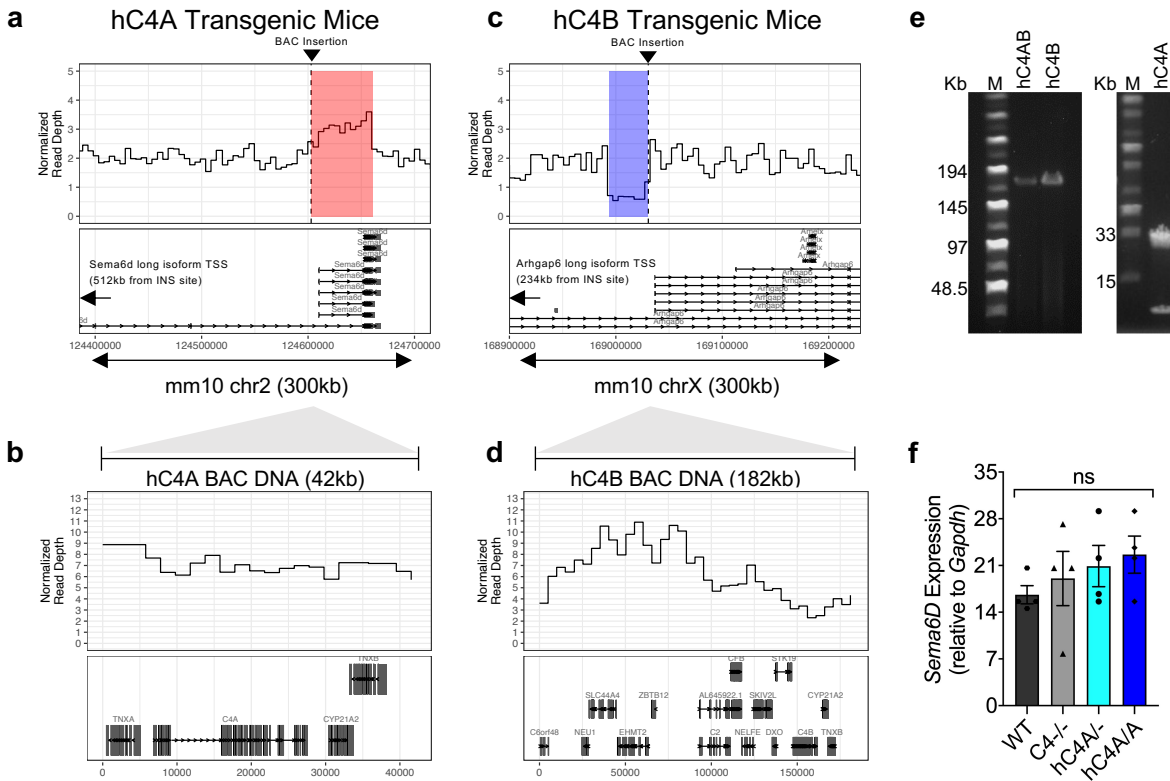

### Extended Figure 1: Characteristics of C4 BAC DNA integration

**a-d**, Insertion sites and associated rearrangements are shown for each mouse strain. **a, c**, The BAC DNA insertion site is shown for each mouse strain. Normalized read depth in 2-kb genomic windows at the insertion sites of the BACs. Dashed vertical lines indicate the insertion site. The hC4A insertion was associated with a duplication, and the hC4B insertion was associated with a small deletion. **b, d**, The BAC DNA-associated rearrangements are shown for each mouse strain. Normalized read depth in 1-kb genomic windows shows the copy number of the inserted constructs. Gene models are shown beneath the read depth plots. Human C4A was likely inserted into hC4A transgenic mice at a normalized read depth between 5 and 9. Human C4B was likely inserted into hC4B transgenic mice at a copy number between 2 and 5. The inserted hC4B BAC constructs contain additional internal copy number variants. **e**, Pulse-field gel showing linearized hC4B and hC4A BAC DNA used for microinjection into zygotes (representative of 3 independent experiments). **f**, *Sema6D* mRNA expression level in cortex was not changed by the region duplication caused by hC4A BAC DNA insertion. *Gapdh* was used as a control housekeeping gene (n = 4 mice per group; ns =  $P > 0.05$ , Kruskal-Wallis test with Dunn's multiple comparisons test). Bar graph shows mean  $\pm$  s.e.m

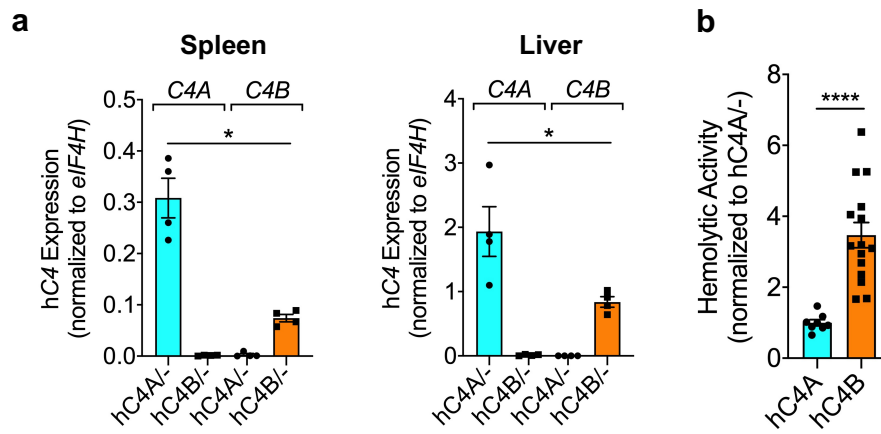

**Extended Figure 2: Peripheral expression and function of C4 in hC4 transgenic mice**

**a**, *C4A*- and *C4B*-specific mRNA level was measured by ddPCR in the spleen (left) and liver (right) of hC4A<sup>-</sup> and hC4B<sup>-</sup> mice. *eiF4H* was used as the control housekeeping gene (n = 4 mice per group; \*  $P_{Spleen} = 0.0286$ , \*  $P_{Liver} = 0.0286$ ; two-tailed Mann-Whitney test). **b**, C4 hemolytic activity was measured with equal amounts of hC4A or hC4B protein using sensitized sheep red blood cells. Data were normalized to hC4A samples (n = 8 hC4A and n = 15 hC4B combined from 3 independent experiments; \*\*\*\*  $P < 0.0001$ , Unpaired, two-tailed t test). Bar graphs show mean  $\pm$  s.e.m.

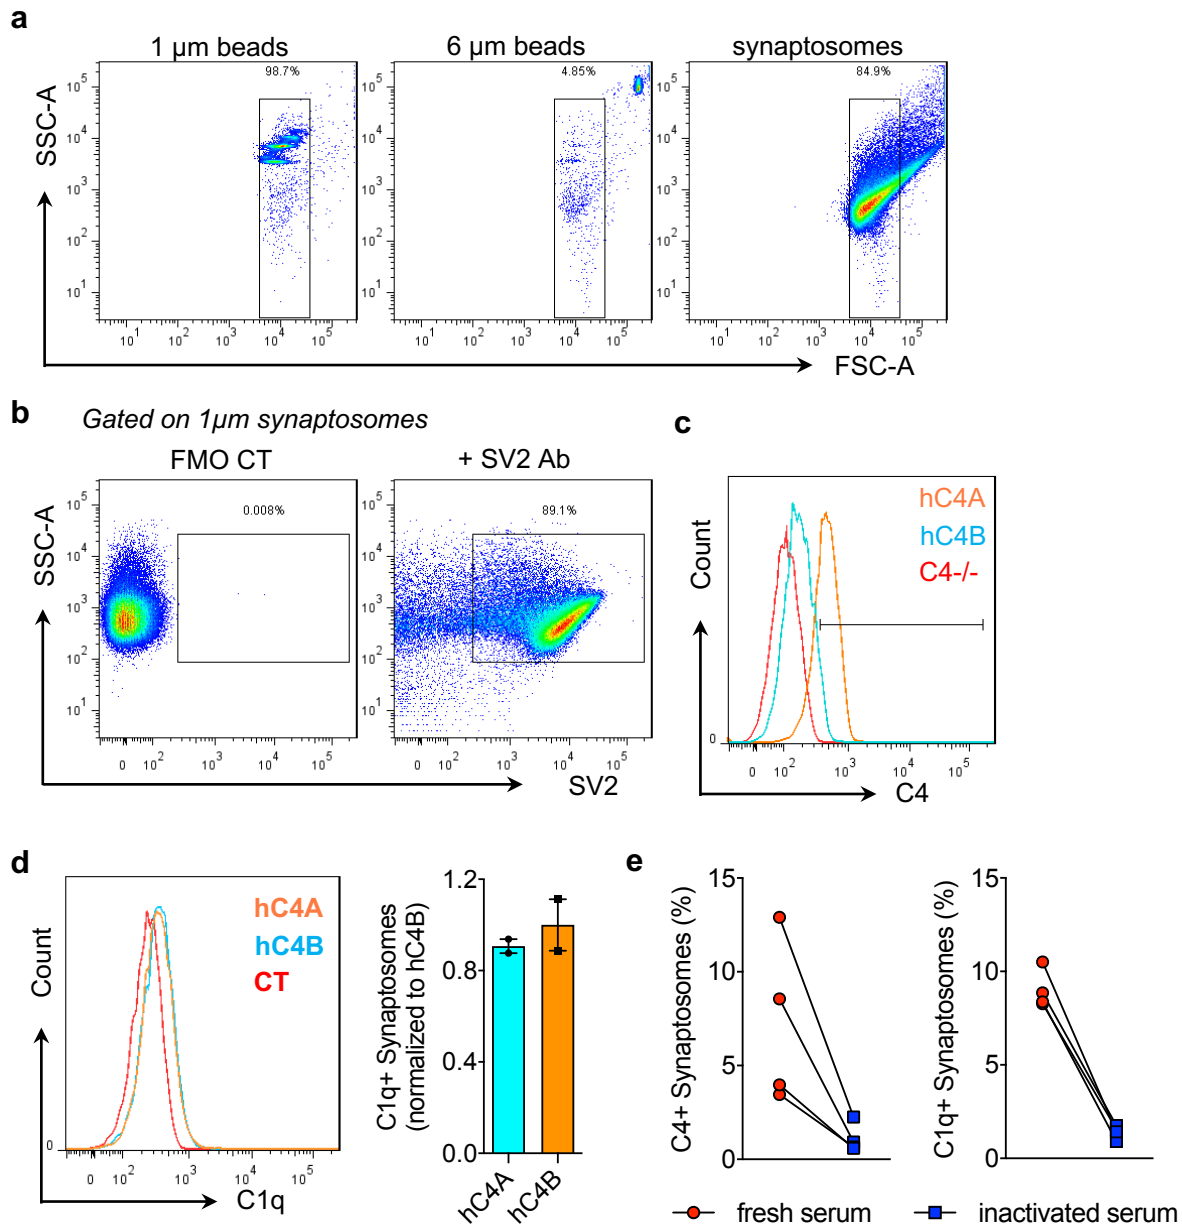

Extended Figure 3: Complement activation and binding to synaptosomes

**a**, Representative dot plots showing the FSC-A / SSC-A of 1- $\mu$ m beads, 6- $\mu$ m beads, and synaptosomes. Further analysis will be gated on 1- $\mu$ m synaptosomes. **b**, Synaptosomes were permeabilized and stained with anti-SV2 antibody (+ SV2 Ab) or no antibody (FMO CT). More than 85% of the particles analyzed contain SV2 protein. **c**, Representative histogram plot of C4 staining on synaptosomes isolated from C4<sup>-/-</sup> mice and incubated with serum from C4<sup>-/-</sup> (red), hC4A (orange), and hC4B (blue) mice. **d**, C1q deposition is shown and quantified using serum from hC4A mice (orange; n = 2), hC4B mice (blue; n = 2), or no serum CT (red). **e**, C4 (left) and C1q (right) deposition was detected on synaptosomes using fresh (red) or heat-inactivated (blue) serum. Bar graph shows mean  $\pm$  s.e.m.

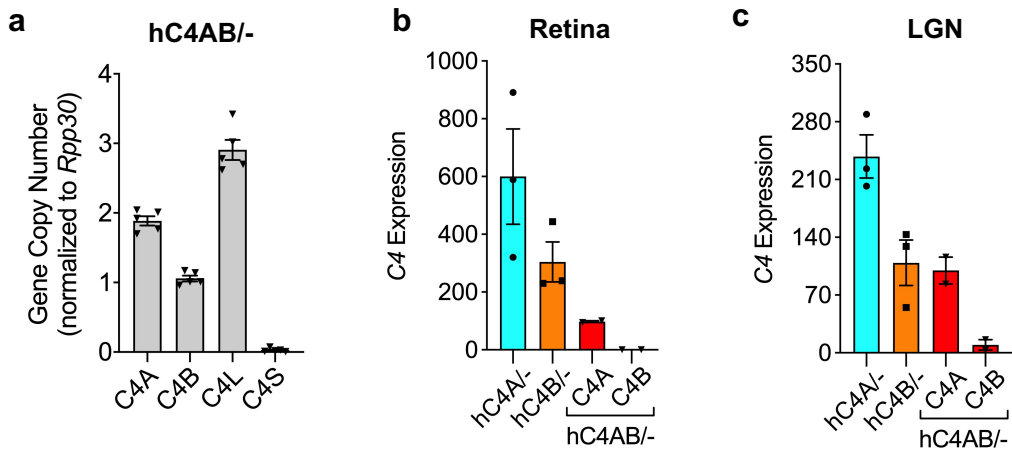

Extended Figure 4: Human C4 in the retinogeniculate system

**a**, *hC4AB*<sup>-/-</sup> mice: gene copy numbers for *C4A*, *C4B*, *C4L*, and *C4S* were determined by ddPCR using *Rpp30* as a reference gene. It showed an insertion of two *C4AL* genes and one *C4BL* gene (*n* = 5 representative mice). Whole-genome sequencing revealed the *hC4AB* BAC DNA was inserted in chromosome 3 and that one *C4A* copy was truncated resulting in only one *C4A* coding copy (data not shown). **b-c**, Absolute quantification by ddPCR was used to measure *C4A*- and *C4B*-specific mRNA level in the retina and LGN from P5 *hC4A*<sup>-/-</sup> (*n* = 3), *hC4B*<sup>-/-</sup> (*n* = 3), and *hC4AB*<sup>-/-</sup> mice (*n* = 2). Bar graphs show mean ± s.e.m.

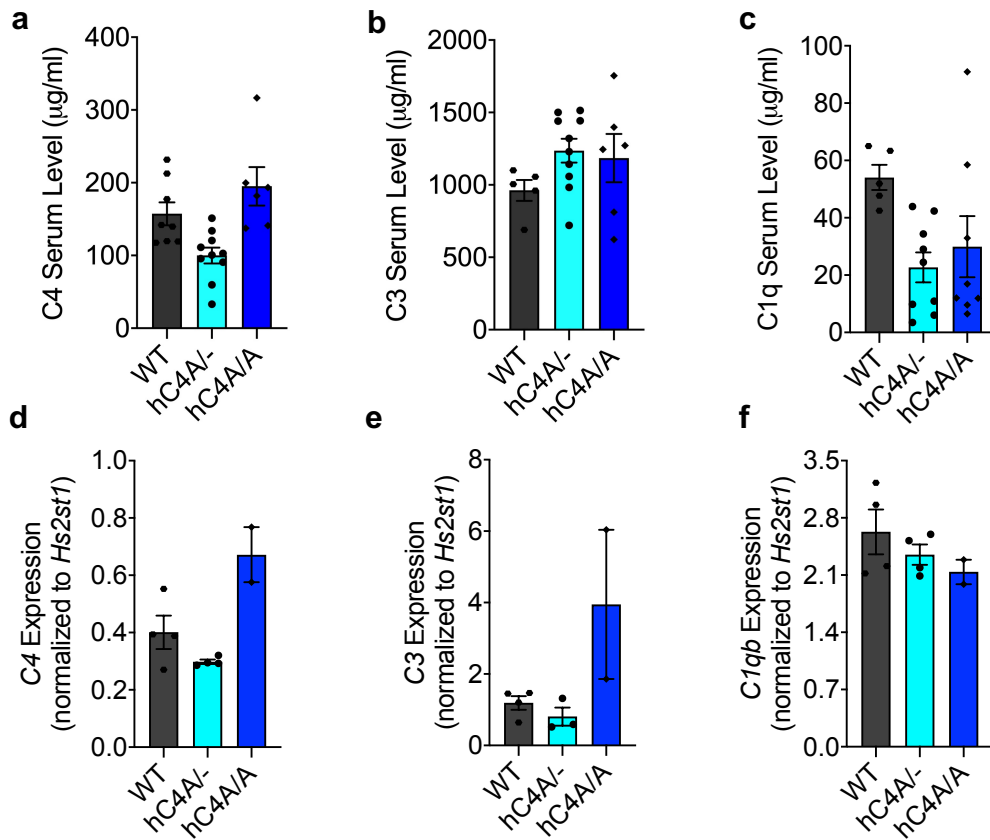

**Extended Figure 5: Complement profile in hC4 transgenic mice during adolescence (P40)**

**a-c**, Level of classical complement cascade proteins were measured in serum by ELISA in adolescent (P40) WT, hC4A<sup>-/-</sup>, and hC4A/A mice. **a**, C4 serum level was measured in WT (n = 8), hC4A<sup>-/-</sup> (n = 10), and hC4A/A mice (n = 6). **b**, C3 serum level was measured in WT (n = 5), hC4A<sup>-/-</sup> (n = 10), and hC4A/A mice (n = 6). **c**, C1q serum level was measured in WT (n = 5), hC4A<sup>-/-</sup> (n = 9), and hC4A/A mice (n = 8). **d-f**, RNA expression of classical complement cascade components in the FC were measured by ddPCR in adolescent (P40) WT, hC4A<sup>-/-</sup>, and hC4A/A mice. All RNA measurements were normalized to *Hs2st1* expression level. **d**, *C4* mRNA expression level in FC was measured in WT (n = 4), hC4A<sup>-/-</sup> (n = 4), and hC4A/A mice (n = 2). **e**, *C3* mRNA expression level in FC was measured in WT (n = 4), hC4A<sup>-/-</sup> (n = 3), and hC4A/A mice (n = 2). **f**, *C1qb* mRNA expression level in FC was measured in WT (n = 4), hC4A<sup>-/-</sup> (n = 4), and hC4A/A mice (n = 2). Bar graphs show mean ± s.e.m.



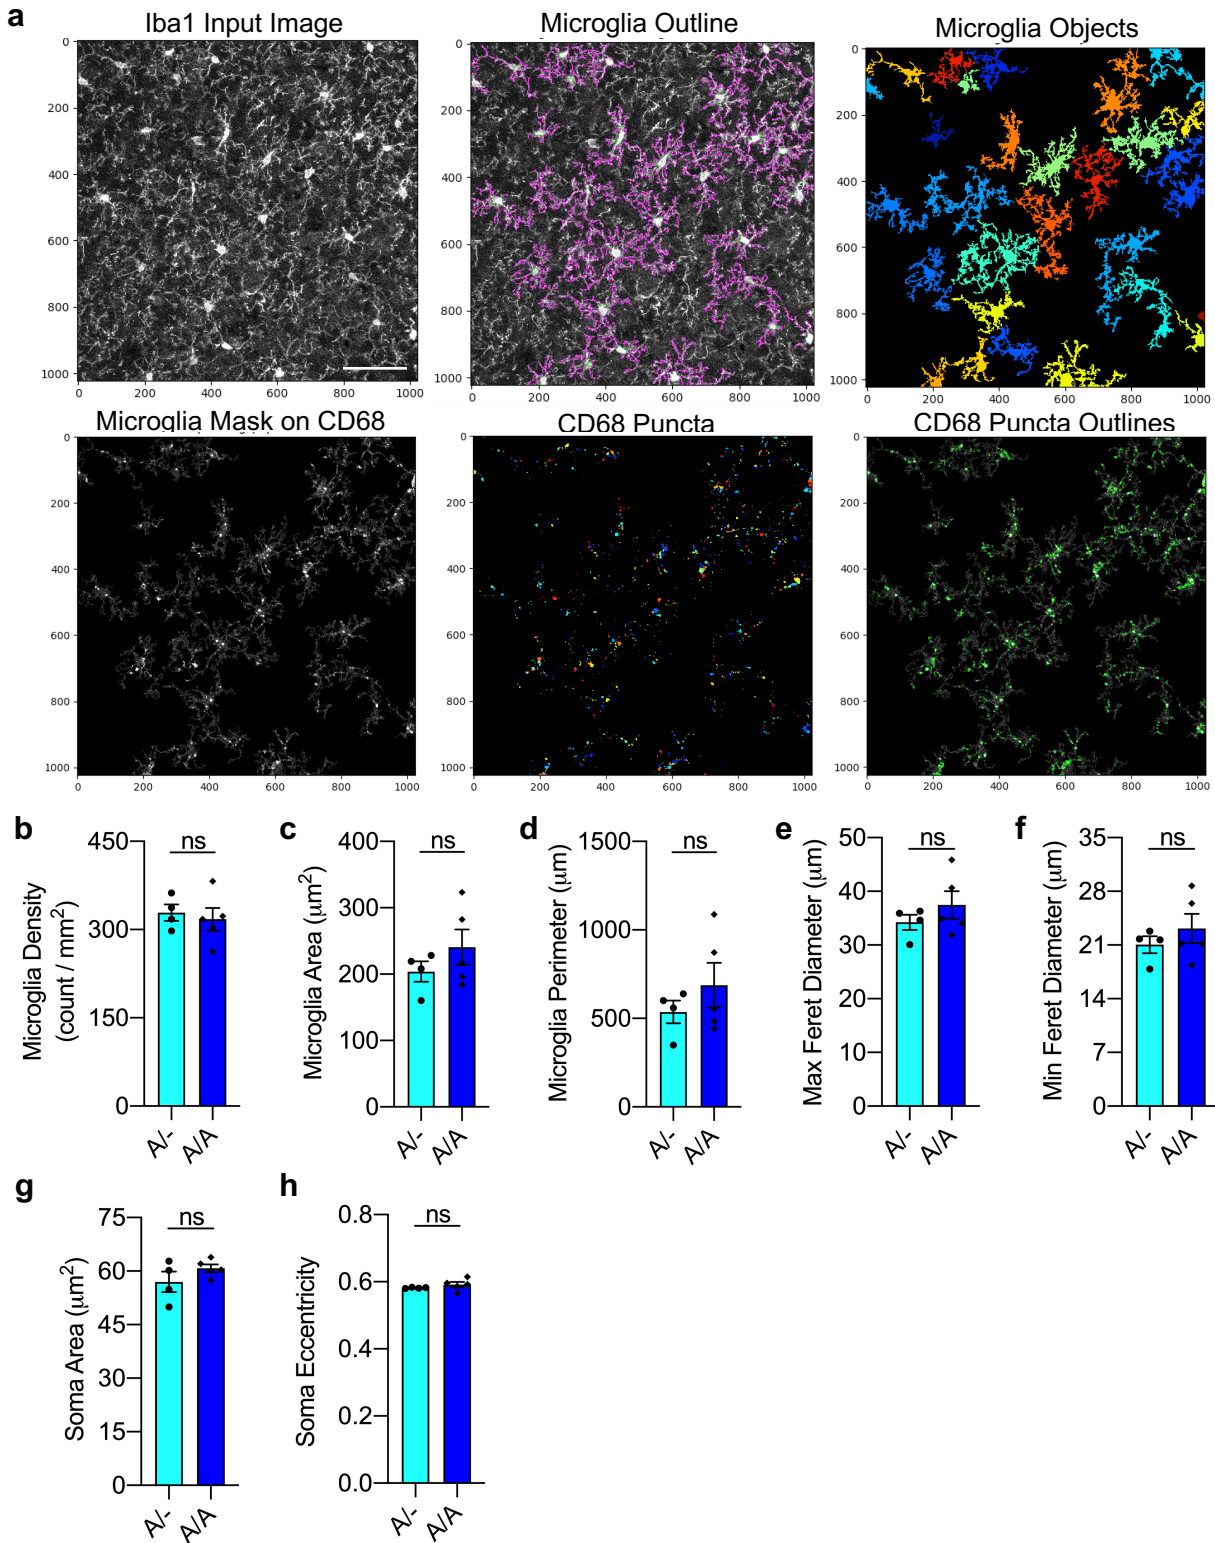

Extended Figure 7: Cell Profiler morphological microglia analysis

**a**, Cell Profiler software was used to analyze microglia morphology and lysosomal activity in the frontal cortex of P40 hC4A<sup>-/-</sup> and hC4A<sup>+/+</sup> mice. Microglial soma and processes are identified by Iba1 signature by using the image-based watershed method (top row). Microglia are used as a mask to select and quantify intracellular CD68 puncta (bottom row; scale = 50 µm). **b-h**, Morphological parameters for mPFC microglia (**b-f**) and their soma (**g-h**) from hC4A<sup>-/-</sup> (n = 4) and hC4A<sup>+/+</sup> (n = 5) mice were calculated by Cell Profiler software at P40 timepoint (ns = P > 0.05, two-tailed Mann-Whitney test). Bar graphs show mean ± s.e.m.

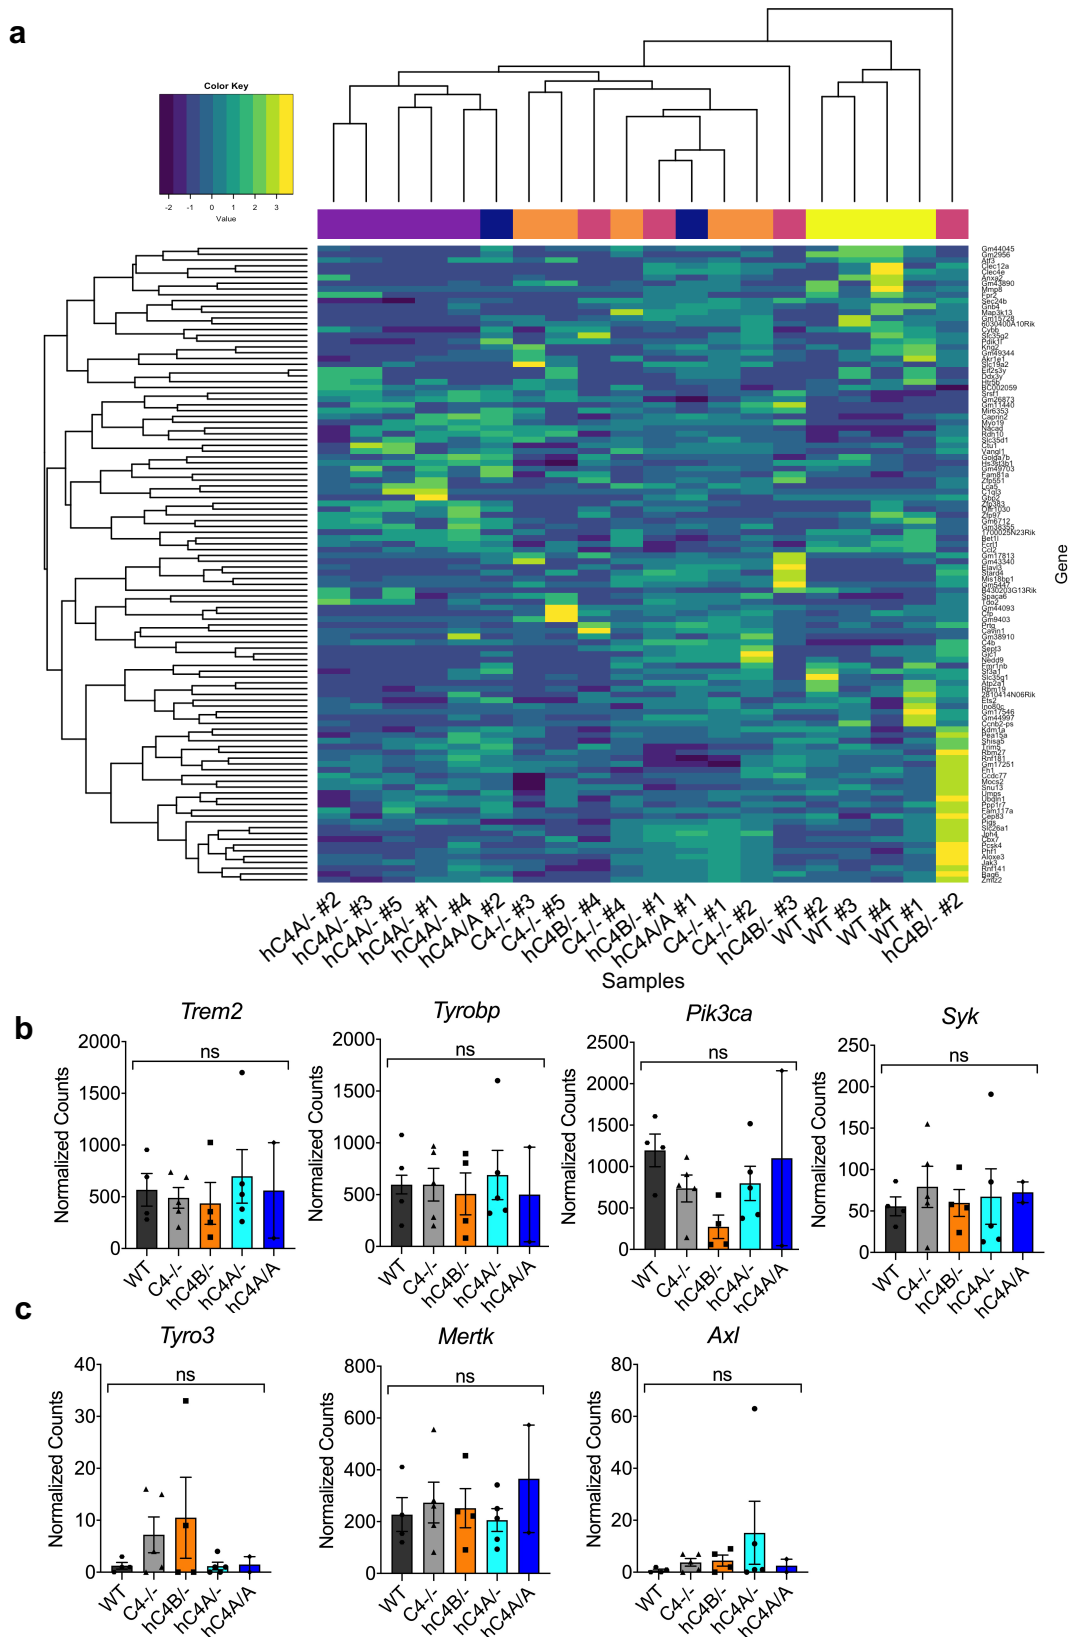

Extended Figure 8: Microglial RNA sequencing analysis reveals no transcriptomic alterations in hC4 transgenic mice

**a**, Bulk RNA sequencing analysis of microglia isolated from the frontal cortex of adolescent (P40) mice from WT (n = 4), C4<sup>-/-</sup> (n = 5), and hC4A<sup>-/-</sup> (n = 5), hC4B<sup>-/-</sup> (n = 4), and hC4A/A (n = 2) groups. Heatmap representation of differentially expressed genes between all experimental groups shows no significant transcriptional profile difference between any two groups. **b-c**, Normalized gene counts for the TREM2/DAP12 signaling pathway (**b**) and TAM receptor genes (**c**) were calculated for WT (n = 4), C4<sup>-/-</sup> (n = 5), hC4A<sup>-/-</sup> (n = 5), hC4B<sup>-/-</sup> (n = 4), and hC4A/A (n = 2; ns =  $P > 0.05$ , Kruskal-Wallis test with Dunn's test). Bar graphs show mean  $\pm$  s.e.m.



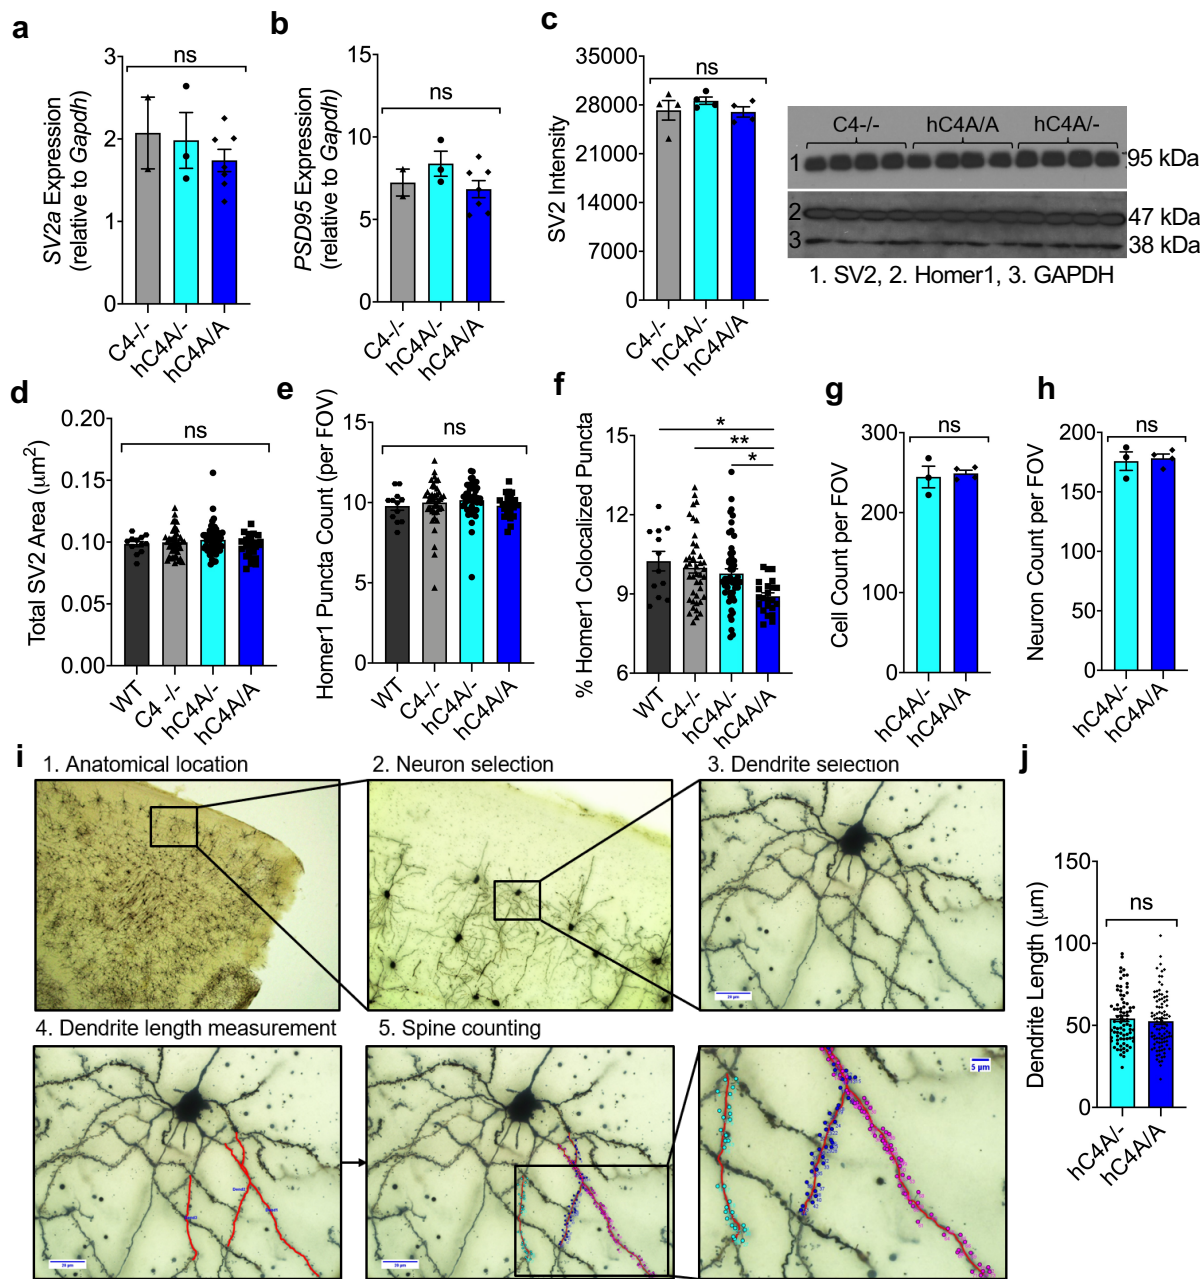

### Extended Figure 9: Synaptic protein expression is not affected by C4A overexpression in mice

**a-b**, rt-PCR was used to measure mRNA expression of *Sv2a* (**a**) and *Psd95* (**b**) in the FC in adult mice (C4<sup>-/-</sup> n = 2, hC4A<sup>-/-</sup> n = 3, and hC4A/A littermates n = 7; Kruskal-Wallis test with Dunn's multiple comparisons test; ns =  $P > 0.05$ ). RNA expression was normalized to *Gapdh* expression. **c**, SV2 and PSD95 protein level were analyzed by western blot. GAPDH was used as a loading control protein (C4<sup>-/-</sup> n = 4, hC4A<sup>-/-</sup> n = 4, and hC4A/A n = 4 littermates from one experiment; Kruskal-Wallis test with Dunn's multiple comparisons test; ns =  $P > 0.05$ ). **d**, Total SV2 area per FOV in the mPFC was calculated from immunofluorescence staining between WT (n = 3), C4<sup>-/-</sup> (n = 11), hC4A<sup>-/-</sup> (n = 13), and hC4A/A (n = 6) groups (Kruskal-Wallis test with Dunn's multiple comparisons test). **e-f**, Total Homer1 puncta and percentage of colocalized Homer1 puncta from the mPFC in adult mice were calculated for WT (n = 3), C4<sup>-/-</sup> (n = 11), hC4A<sup>-/-</sup> (n = 13), and hC4A/A (n = 6) groups (Kruskal-Wallis test with Dunn's multiple comparisons test; ns =  $P > 0.05$ , \*  $P_{WT\ vs\ A/A} = 0.0139$ , \*\*  $P_{WT\ vs\ A/A} = 0.0139$ ). **g-h**, Brain sections were stained with DAPI and NeuN, and cellularity was measured in frontal cortex at P180. Total cells (**g**) and neurons (**h**) per FOV in frontal cortex is represented for hC4A<sup>-/-</sup> (n = 3) and hC4A/A mice (n = 4; two-tailed Mann-Whitney test; ns =  $P > 0.05$ ). **i**, Method used for the manual counting of dendritic spines in mPFC of hC4 mice. **j**, Length of dendrites that have been used for spine density analysis for hC4A<sup>-/-</sup> (80 dendrites) and hC4A/A (96 dendrites; two-tailed Mann-Whitney test; ns =  $P > 0.05$ ). Bar graphs show mean  $\pm$  s.e.m.

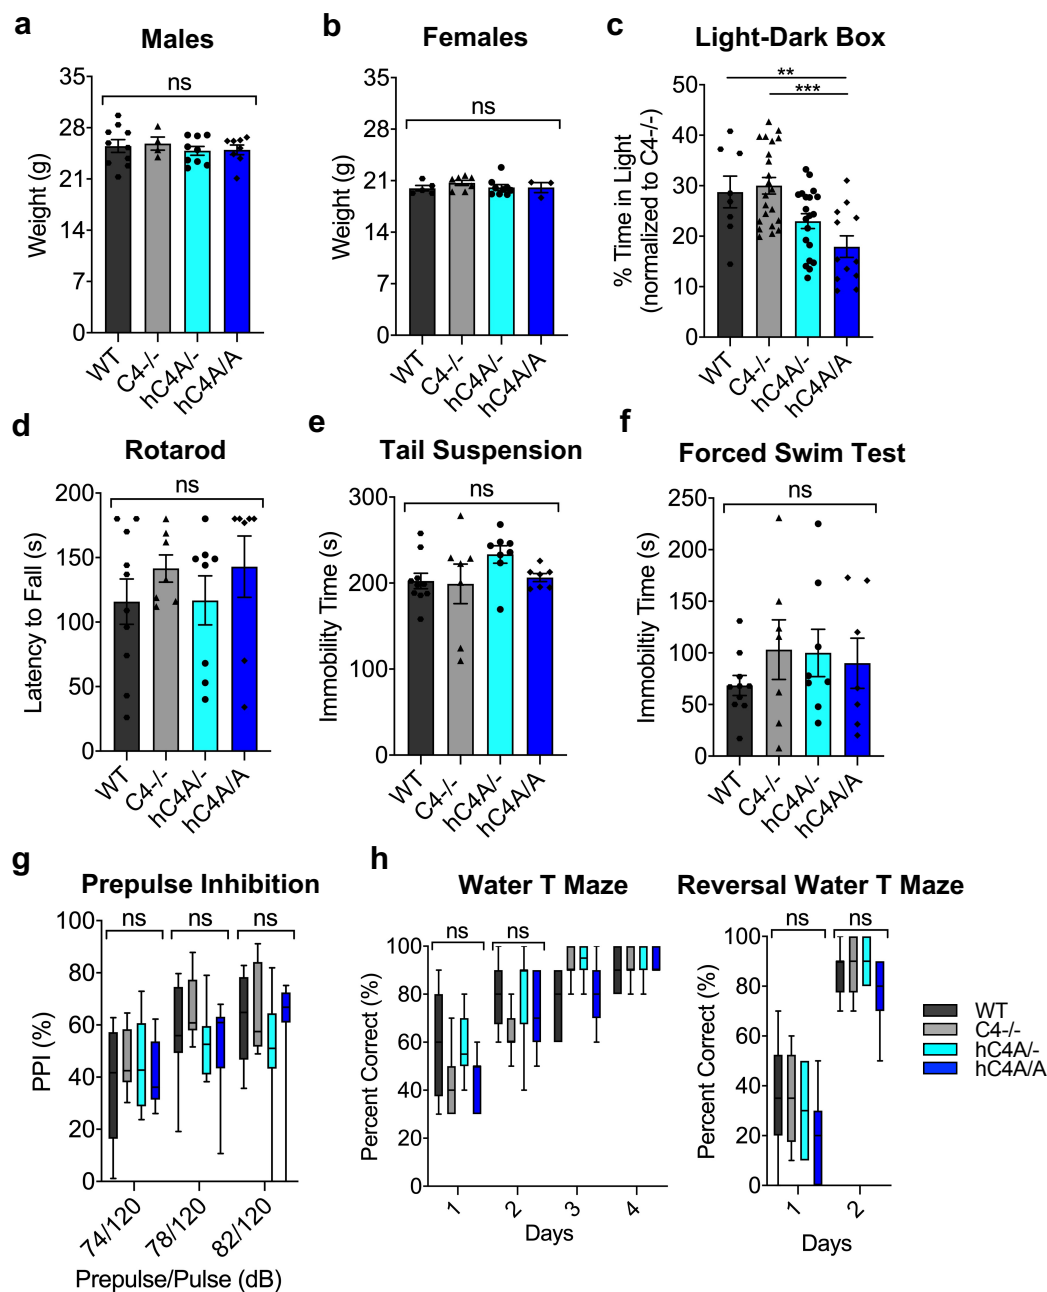

### Extended Figure 10: Human C4A overexpression alters mouse behavior

**a-h**, WT, C4<sup>-/-</sup>, hC4A<sup>-/-</sup>, and hC4A/A mice were subjected to a battery of behavioral tests. **a-b**, Weight of male and female mice were compared between WT (n = 10), C4<sup>-/-</sup> (n = 4), hC4A<sup>-/-</sup> (n = 9), and hC4A/A mice (n = 8; Kruskal-Wallis test with Dunn's multiple comparisons test; ns =  $P > 0.05$ ). **c**, Anxiety levels were measured in the light-dark box test by time spent in the light-zone between WT (n = 8), C4<sup>-/-</sup> (n = 22), hC4A<sup>-/-</sup> (n = 20), and hC4A/A (n = 12) groups (two-tailed, unpaired t test; \*\*  $P = 0.0085$ ; two-tailed Mann-Whitney test, \*\*\*  $P = 0.0009$ ). Results were normalized to the C4<sup>-/-</sup> group to retain littermate controls. **d**, In the rotarod test, latency to fall was measured in seconds for WT (n = 10), C4<sup>-/-</sup> (n = 7), hC4A<sup>-/-</sup> (n = 8), and hC4A/A (n = 7) groups (Kruskal-Wallis test with Dunn's multiple comparisons test, ns =  $P > 0.05$ ). **e-f**, Immobility time in seconds was compared in the tail suspension test (**e**) and the forced swim test (**f**) for WT (n = 10), C4<sup>-/-</sup> (n = 7), hC4A<sup>-/-</sup> (n = 8), and hC4A/A (n = 7) groups (Kruskal-Wallis test with Dunn's multiple comparisons test, ns =  $P > 0.05$ ). **g**, Prepulse inhibition was measured between WT (n = 10), C4<sup>-/-</sup> (n = 7), hC4A<sup>-/-</sup> (n = 8), and hC4A/A (n = 7) groups (two-way ANOVA with Tukey's multiple comparisons test; ns =  $P > 0.05$ ). **h**, Percent of correct decisions were recorded in the water t maze and the reversal water t maze for WT (n = 10), C4<sup>-/-</sup> (n = 7), hC4A<sup>-/-</sup> (n = 8), and hC4A/A (n = 7) groups (two-way ANOVA with Tukey's multiple comparisons test; ns =  $P > 0.05$ ). Bar graphs show mean  $\pm$  s.e.m. Box-and-whisker plots display the median (center line), 25<sup>th</sup> to 75<sup>th</sup> percentile (box), and minimum to maximum values (whiskers).
