# Supplementary material
Source: PubMed Central journal article supplement (PMC8086435)
Supplement: NIHMS1679849-supplement-Supplementary_information.pdf [file NIHMS1679849-supplement-Supplementary_information.pdf]

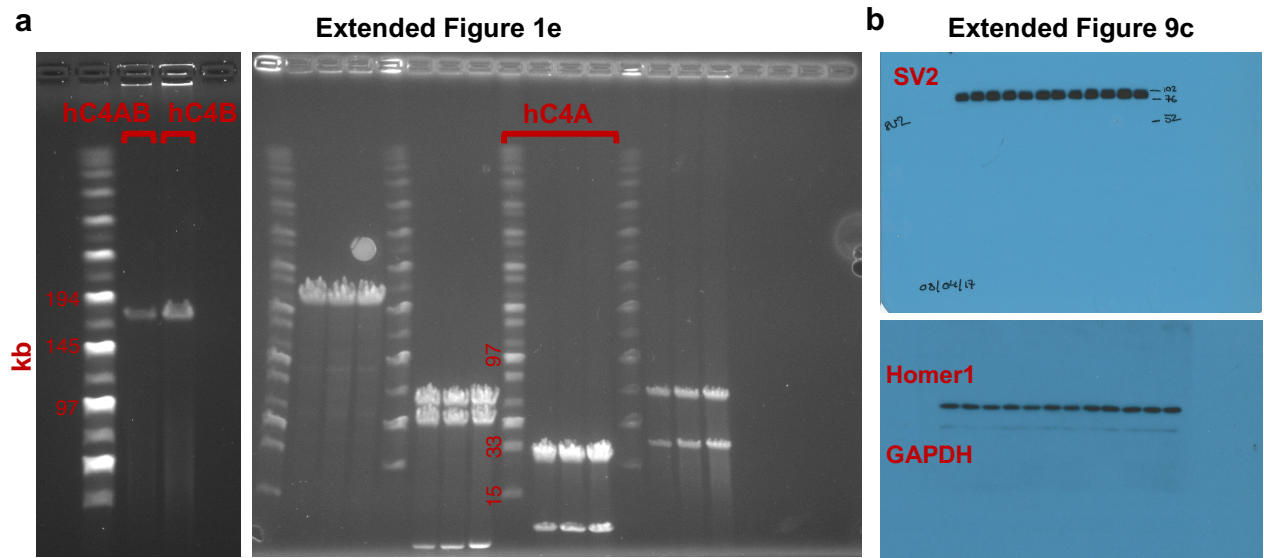

Supplementary Figure 1: Unprocessed gels and blots

**a**, Unprocessed gels from Ext. Fig. 1e showing the pulse-field gel electrophoresis of BAC DNA used in generating the hC4AB<sup>-/-</sup>, hC4B<sup>-/-</sup> (left), and hC4A<sup>-/-</sup> (right) mice. **b**, Unprocessed western blot films from Ext. Fig 9c showing the synaptic protein levels with respect to GAPDH.

Supplementary Table 1: Detailed information of the human C4 BAC DNA

Supplementary Table 2: Primer List

Supplementary Table 3: Antibody List

Supplementary Table 4: Neural Tracing Reagents

Supplementary Table 5: Statistical Analysis Summary
